# Supplementary material
Source: PubMed Central journal article supplement (PMC5135269)
Supplement: jciinsight-1-89805-s001.pdf [file jciinsight-1-89805-s001.pdf]

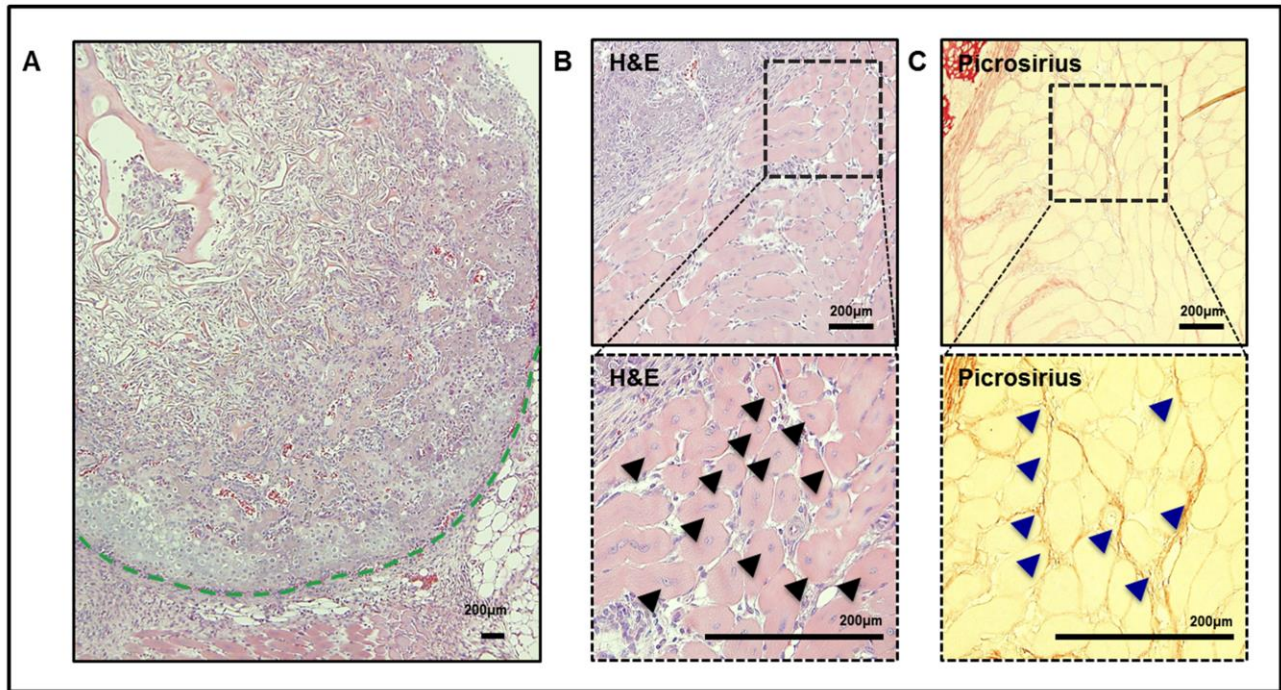

**Fig S1. Intramuscular BMP ossicle implantation with concomitant cardiotoxin injury causes surrounding myofiber damage and fibrosis.** (A) Ectopic bone at the site of BMP ossicle and cardiotoxin placement (green line demarcates border of ectopic bone); (B) Myofiber damage located outside of the ectopic bone (black arrowheads indicate centralized nuclei); (C) Areas of fibrosis corresponding to myofiber damage in (B) indicated by picrosirius red (blue arrowheads indicate picrosirius staining). All scale bars = 200 μm.

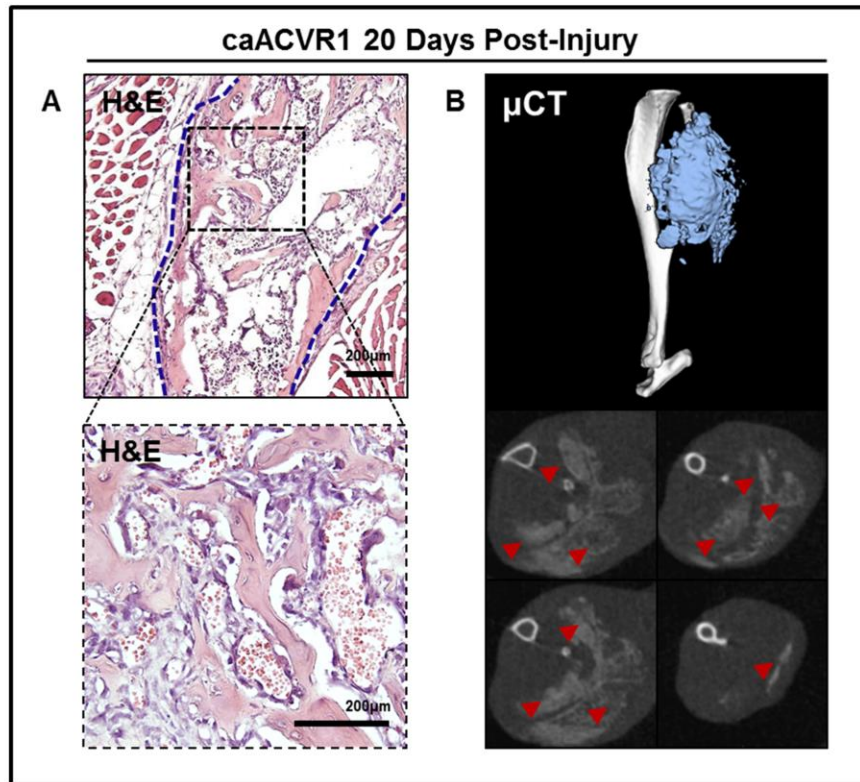

**Fig S2. Intramuscular ectopic bone in a model of hyperactive BMP signaling with cardiotoxin injury.** (A) H&E showing ectopic bone in gastrocnemius muscle of *caAcvr1<sup>f/f</sup>* mice 20 days after Ad.cre/CTX (adenoviral cre and cardiotoxin) injury; (B) MicroCT confirming presence of ectopic bone (blue) on 3-D reconstruction and serial cross-sections (red arrowheads). All scale bars = 200  $\mu$ m.

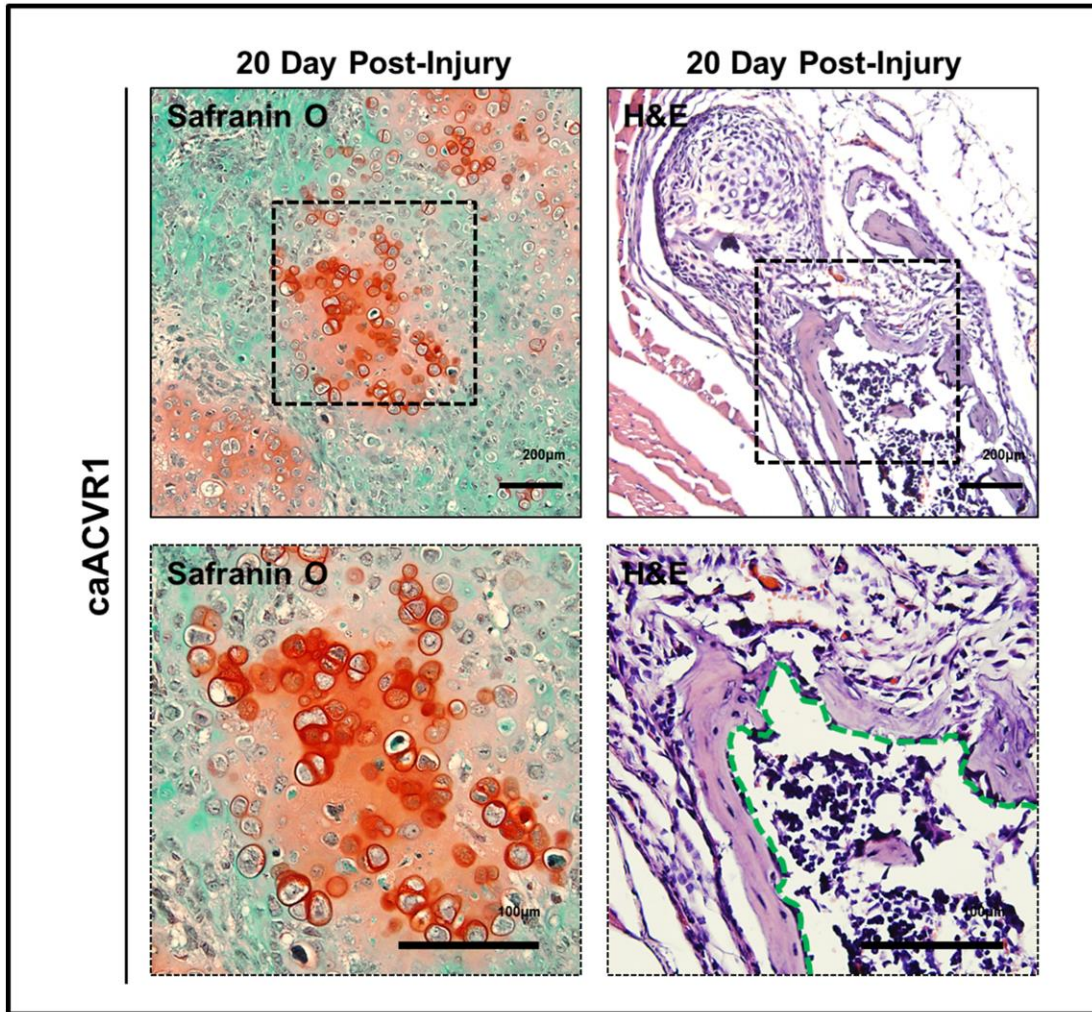

**Fig S3. Intramuscular bone formation in *caACVR1<sup>fl/fl</sup>* mice is an endochondral process.** Histologic staining of heterogenous intramuscular HO regions in *caAcvr1<sup>fl/fl</sup>* mouse, demonstrating cartilage formation with Safranin O staining (red), and woven bone with developing marrow space (green outline) by H&E staining, indicating HO formation is a dynamic and endochondral process.

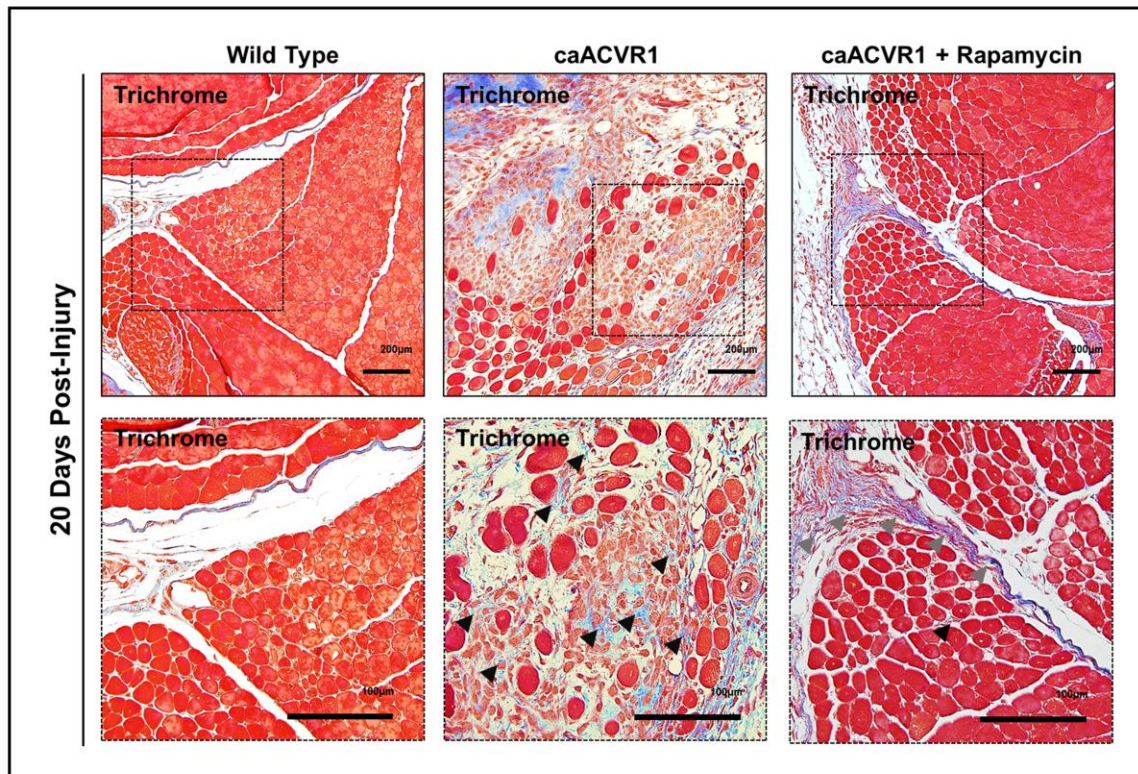

**Fig S4. Rapamycin attenuates collagen deposition induced by activation of *caACVR1<sup>f/f</sup>* mutation.**

Trichrome staining of wild-type, mutant *caAcvr1<sup>f/f</sup>*, and mutant mice treated with rapamycin 20 days following Ad.cre/CTX injury, demonstrating intramuscular deposition in mutant mice, and resolution with rapamycin treatment.

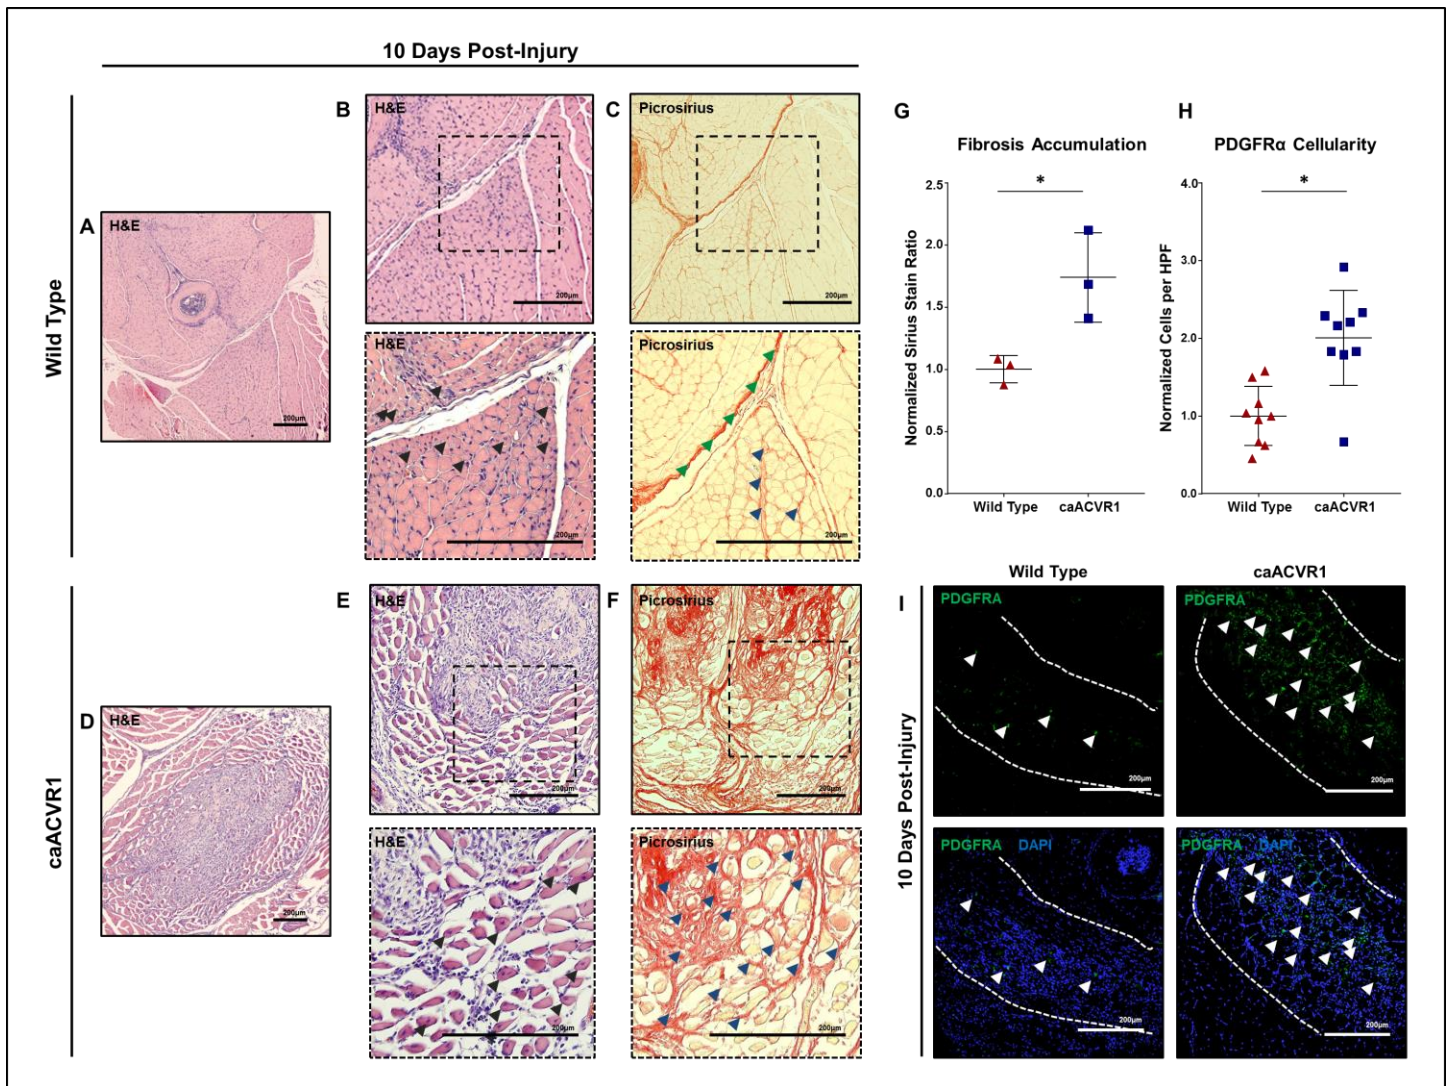

**Fig S5. Myofiber injury and fibrosis precede the osseous lesion in *caACVR1<sup>fl/fl</sup>* mice 10 days after *Ad.cre/CTX* injury.** (A) Absence of ectopic bone in wild-type hindlimb 10 days after *Ad.cre/CTX*-injury; (B) Area of myofiber injury with centralized nuclei in wild type mice 10 days after injury (black arrowheads indicate myofibers with centralized nuclei); (C) Fibrosis corresponding with regions of myofiber injury (green arrowheads indicate fascial plane; blue arrowheads indicate fibrosis); (D) Absence of ectopic bone in *caACVR1<sup>fl/fl</sup>* mouse 10 days after *Ad.cre/CTX*-injury; (E) Area of myofiber injury with centralized nuclei in mutant mice 10 days after injury (black arrowheads indicate myofibers with centralized nuclei); (F) Fibrosis corresponding with regions of myofiber injury (blue arrowheads indicate fibrosis); (G) Increased fibrosis staining based on picrosirius in *caACvr1<sup>fl/fl</sup>* mice when compared with wild type mice 10 days after *Ad.cre/CTX* injury (normalized ratio: 1.74 v. 1.0, n=3, student's two-tailed T-Test p<0.05); (H) Increased accumulation of mesenchymal cells (PDGFRA) at injury site of *caACVR1<sup>fl/fl</sup>* mice when compared with wild type mice 10 days

after Ad.cre/CTX injury (normalized ratio: 2.0 v. 1.0, n=8, students two-tailed T-Test,  $p < 0.05$ ); (I)

Representative immunostaining for PDGFRA in wild type and *caACVR1<sup>fl/fl</sup>* mice 10 days after Ad.cre/CTX injury (white arrowheads indicate PDGFRA+ cells; white dashed line demarcates area of fibrosis and myofiber injury). All scale bars = 200  $\mu$ m. \* $p < 0.05$ .

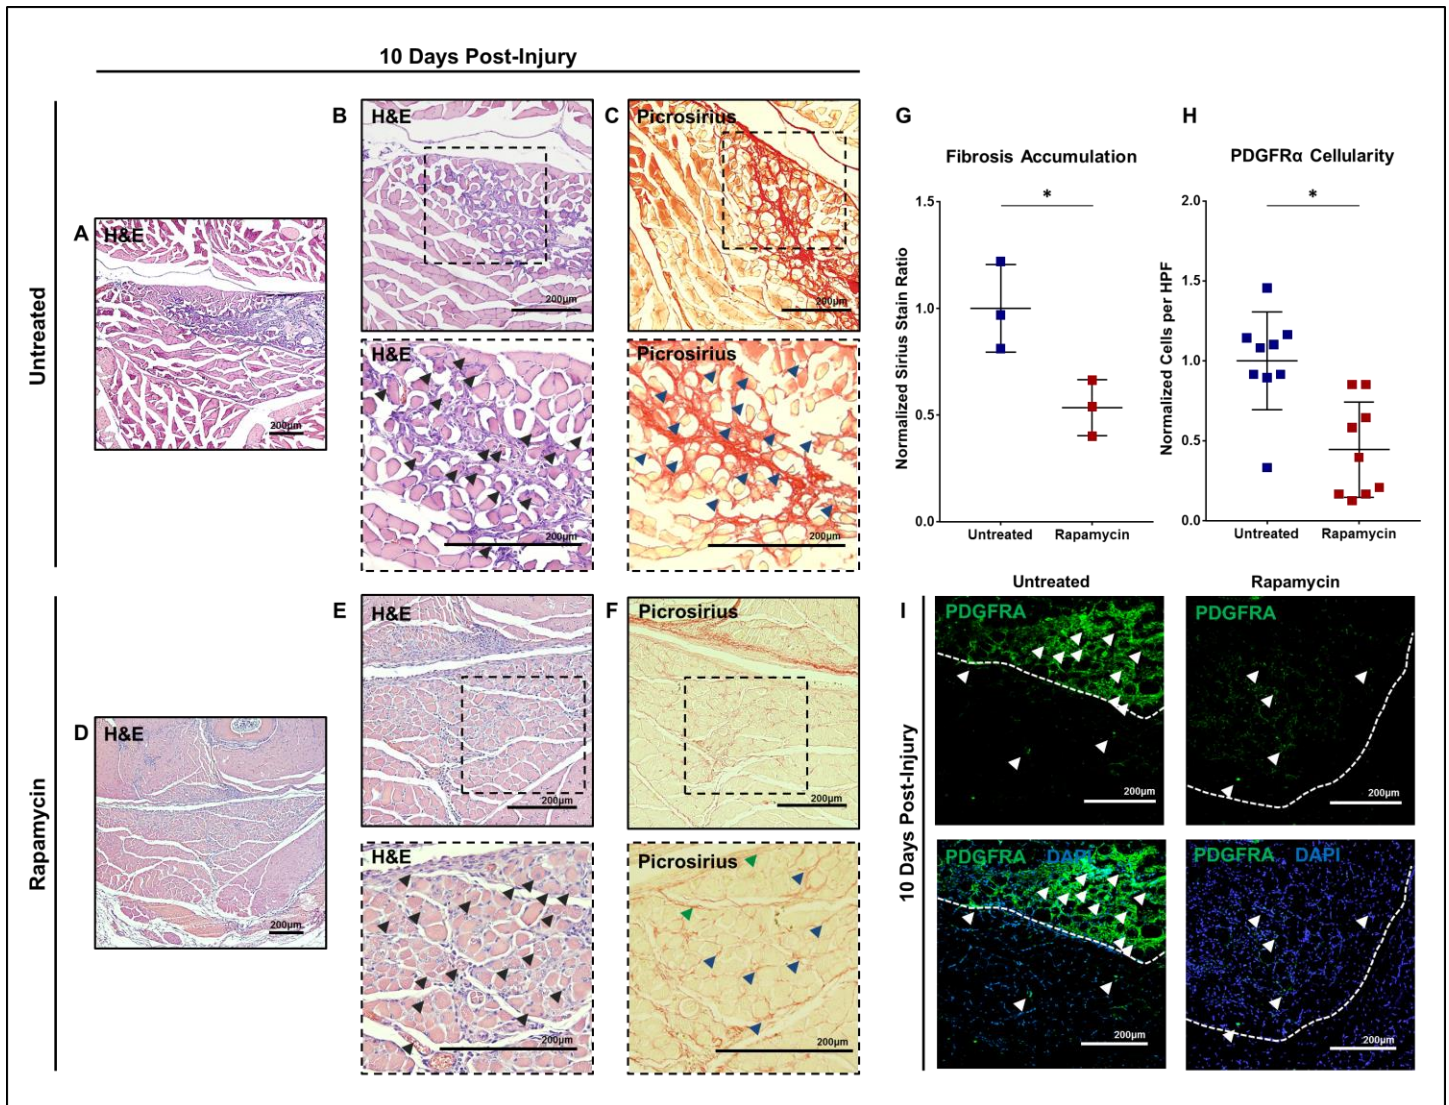

**Fig S4. Rapamycin eliminates fibrosis associated with hyperactive BMP signaling early after injury.** (A) Absence of ectopic bone in untreated and rapamycin-treated *caACVR1<sup>fl/fl</sup>* mice 10 days after Ad.cre/CTX (adenoviral cre and cardiotoxin injury); (B) Area of myofiber injury with centralized nuclei in untreated *caACVR1<sup>fl/fl</sup>* mice 10 days after Ad.cre/CTX injury (black arrowheads indicate myofibers with centralized nuclei); (C) Fibrosis corresponding with regions of myofiber injury in untreated *caACVR1<sup>fl/fl</sup>* mice 10 days after Ad.cre/CTX injury (blue arrowheads indicate fibrosis); (D) Absence of ectopic bone in the hindlimb of rapamycin-treated *caACVR1<sup>fl/fl</sup>* mice 10 days after Ad.cre/CTX injury; (E) Area of myofiber injury with centralized nuclei in rapamycin-treated *caACVR1<sup>fl/fl</sup>* mice 10 days after Ad.cre/CTX injury (black arrowheads indicate myofibers with centralized nuclei); (F) Fibrosis corresponding with regions of myofiber injury in rapamycin-treated *caACVR1<sup>fl/fl</sup>* mice 10 days after Ad.cre/CTX injury (blue arrowheads indicate fibrosis); (G) Quantification confirms reduction in fibrosis in areas of muscle injury (normalized ratio: 0.52 v. 1.0, n=3, student's two-tailed T-Test,  $p < 0.05$ ); (H) Quantification confirms reduction in mesenchymal cells (PDGFR $\alpha$ ) in areas of muscle injury (normalized ratio: 0.44 v. 1.0, n=8, student's two-tailed T-Test,  $p < 0.05$ ); (I) Representative immunostaining for PDGFR $\alpha$  in untreated and rapamycin-treated, *caACVR1<sup>fl/fl</sup>* mice 10 days after Ad.cre/CTX injury. All scale bars = 200  $\mu$ m. \* $p < 0.05$ .

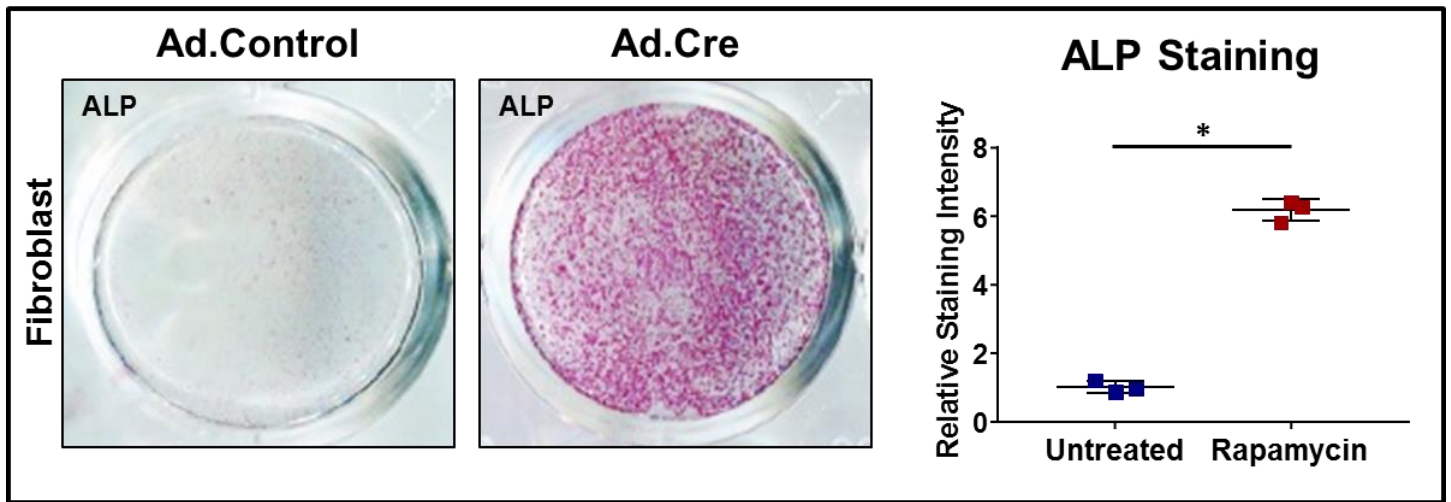

**Supplemental Fig 7. Fibroblasts harvested from *caACVR1<sup>fl/fl</sup>* mice exhibit increased osteogenesis in vitro.** ALP staining of fibroblasts harvested from *caACVR1<sup>fl/fl</sup>* mice treated with control (Ad.Control) and Ad.Cre virus respectively. Spectroscopy quantification staining demonstrating increased osteogenic activity in Ad.Cre treated cells (normalized staining intensity, 6.15 v. 1, n=3, student's two-tailed T-Test,  $p < 0.05$ ).



**Table One:** Reported complications associated with surgical use of rhBMP2 implants

|                          | <u>All Events</u> |      | <u>Inflammation</u> |      | <u>Infection</u> |      | <u>HO</u> |      | <u>Pain</u> |      |
|--------------------------|-------------------|------|---------------------|------|------------------|------|-----------|------|-------------|------|
|                          | n                 | %    | n                   | %    | n                | %    | n         | %    | n           | %    |
| <b>With Inflammation</b> | 1698              | 16.5 | 1698                | 100  | 372              | 48.4 | 620       | 39.0 | 1469        | 24.2 |
| <b>With Infection</b>    | 768               | 7.5  | 372                 | 21.9 | 768              | 100  | 119       | 7.5  | 577         | 9.5  |
| <b>With HO</b>           | 1588              | 15.5 | 620                 | 36.5 | 119              | 15.5 | 1588      | 100  | 1468        | 24.2 |
| <b>With Pain</b>         | 6071              | 59.2 | 1469                | 86.5 | 577              | 75.1 | 1468      | 92.4 | 6071        | 100  |

**Table 1.** Reported adverse events associated with surgical use of rhBMP2 implants, compiled from the Manufacturer and User Facility Device Experience (MAUDE) Database.
